# Supplementary material for: Environmentally sustainable route to SiO2@Au–Ag nanocomposites for biomedical and catalytic applications
Source: PubMed Central journal article supplement (PMC9085631; doi:10.1039/c8ra04502j), 2018-09-05

## **Environmentally sustainable route to SiO<sub>2</sub>@Au-Ag nanocomposites for biomedical and catalytic applications**

Kanti Sapkota<sup>a,b</sup>, Prerna Chaudhary,<sup>a,b</sup> Sung Soo Han<sup>a,b\*</sup>

<sup>a</sup>School of Chemical Engineering, Yeungnam University, 280 Daehak-Ro, Gyeongsan,  
Gyeongbuk 38541, Republic of Korea

<sup>b</sup>Department of Nano, Medical & Polymer Materials, College of Engineering, Yeungnam  
University, 280 Daehak-Ro, Gyeongsan, Gyeongbuk 38541, Republic of Korea

\*Corresponding author

Prof. Sung Soo Han, Email: [sshan@yu.ac.kr](mailto:sshan@yu.ac.kr)

Tel: +82-53-810-2773; Fax: +82-53-810-4686

~~Synthesis of Pd/Cu-catalyzed tandem coupling/hydroarylation~~

### **Table of Contents**

|                                                                                     |              |
|-------------------------------------------------------------------------------------|--------------|
| <b>XPS survey spectra of SiO<sub>2</sub>@Au-Ag NCs before and after catalysis</b>   | <b>S2</b>    |
| <b><sup>1</sup>H NMR and <sup>13</sup>C NMR data and spectra of compounds 3a-3d</b> | <b>S3-S6</b> |

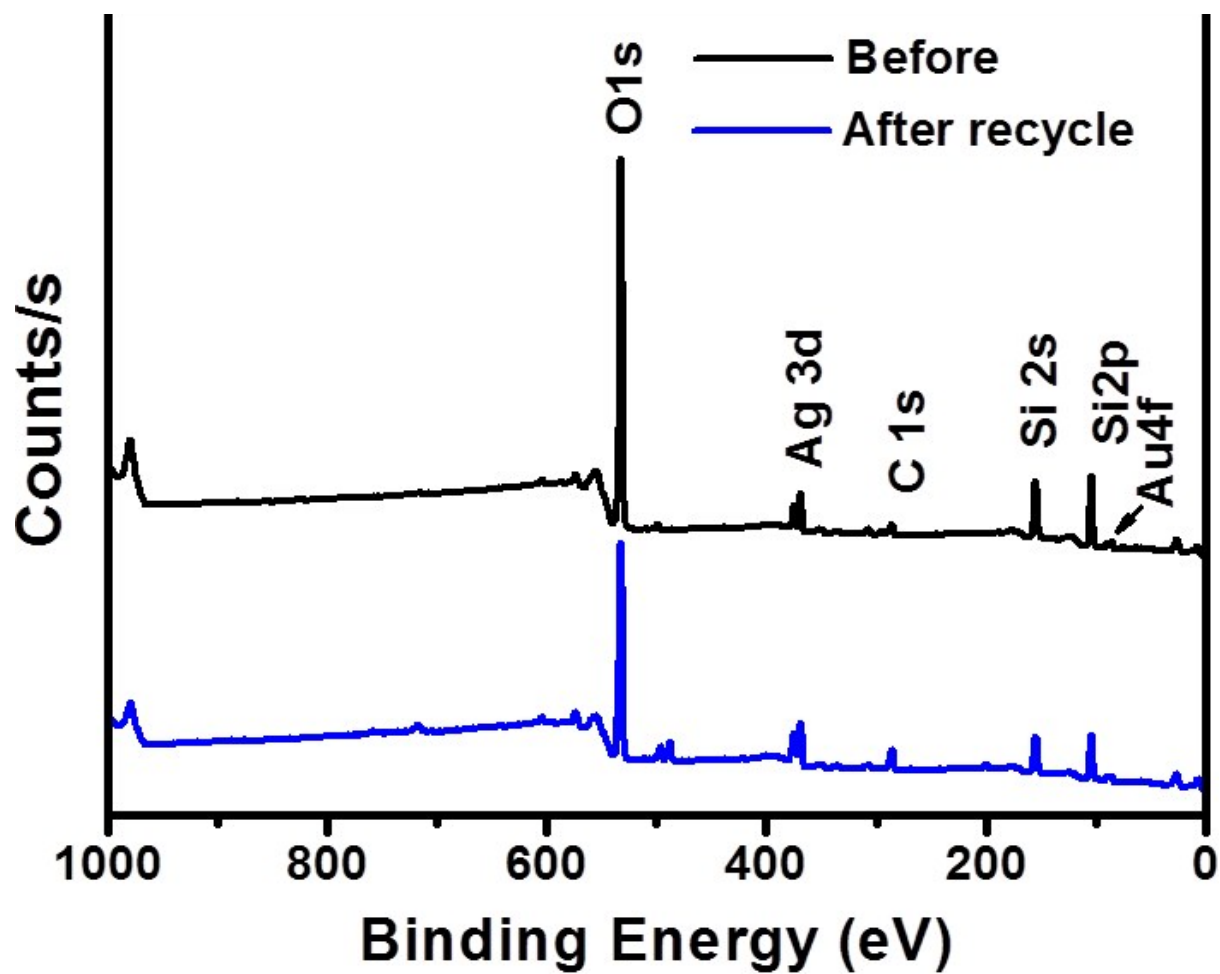

Figure S1 XPS survey spectra of SiO<sub>2</sub>@Au-Ag NCs before and after catalysis

### $^1\text{H}$ NMR and $^{13}\text{C}$ NMR data and spectra of compounds 3a-3d

***N*-Phenylacetamide (3a):**  $^1\text{H}$  NMR (600 MHz,  $\text{CDCl}_3$ )  $\delta$  8.00 (s, 1H), 7.49 (d,  $J = 7.9$  Hz, 2H), 7.27 (t,  $J = 7.9$  Hz, 2H), 7.07 (t,  $J = 7.4$  Hz, 1H), 2.12 (s, 3H);  $^{13}\text{C}$  NMR (150 MHz,  $\text{CDCl}_3$ )  $\delta$  168.8, 137.9, 128.8, 124.2, 120.0, 24.3.

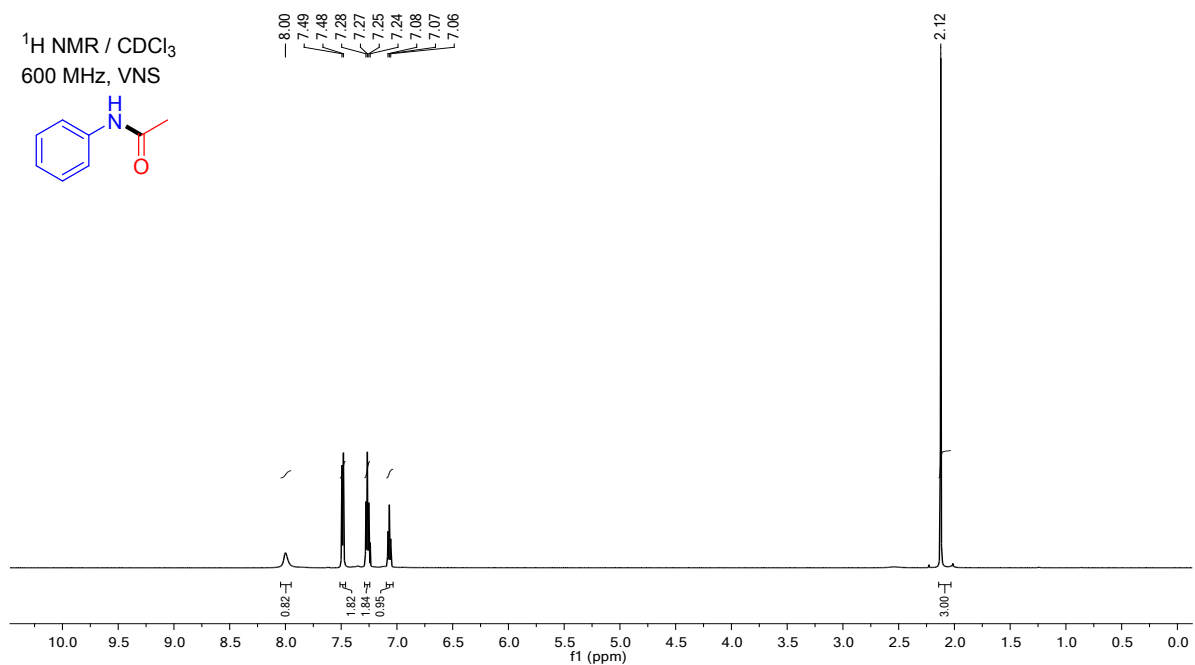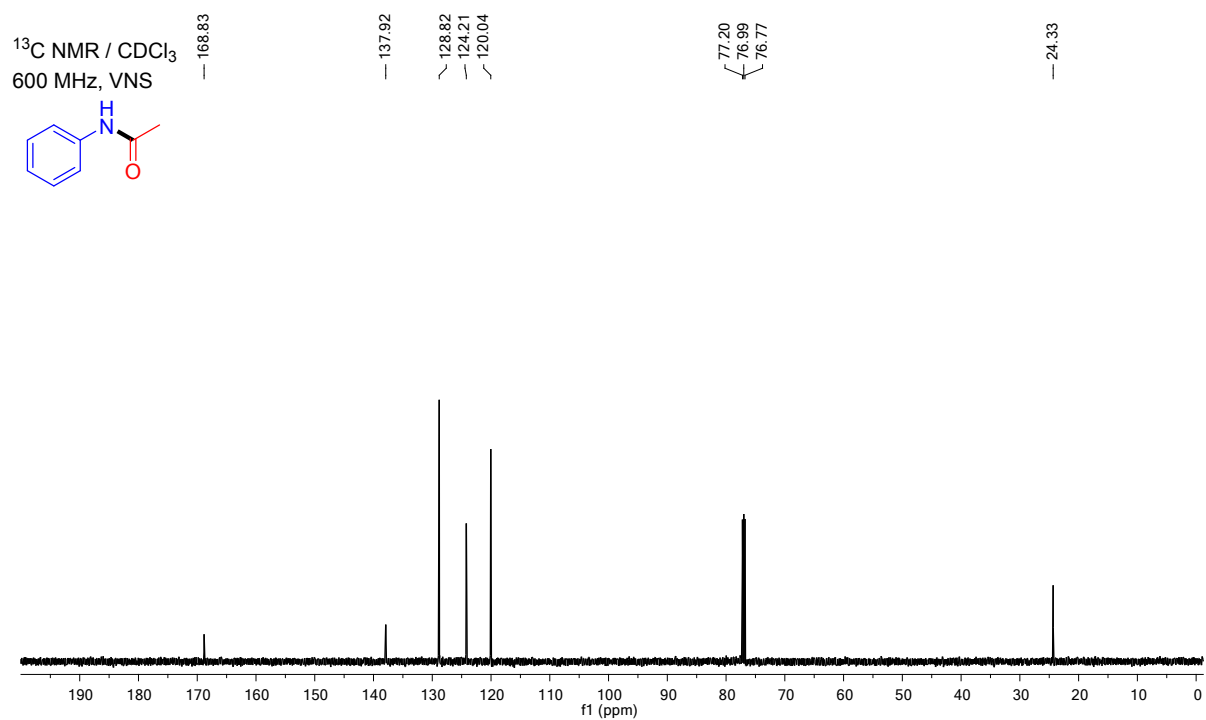

***N*-(3-chlorophenyl)acetamide (3b):**  $^1\text{H}$  NMR (600 MHz  $\text{CDCl}_3$ )  $\delta$  8.27 (s, 1H), 7.62 (s, 1H), 7.31 (d,  $J = 8.0$  Hz, 1H), 7.16 (t,  $J = 8.1$  Hz, 1H), 7.03 (d,  $J = 7.8$  Hz, 1H), 2.14 (s, 3H);  $^{13}\text{C}$  NMR (150 MHz,  $\text{CDCl}_3$ )  $\delta$  169.2, 139.1, 134.4, 129.8, 124.2, 120.1, 118.0, 24.4.

$^1\text{H}$  NMR /  $\text{CDCl}_3$   
600 MHz, VNS

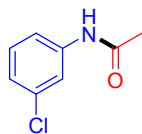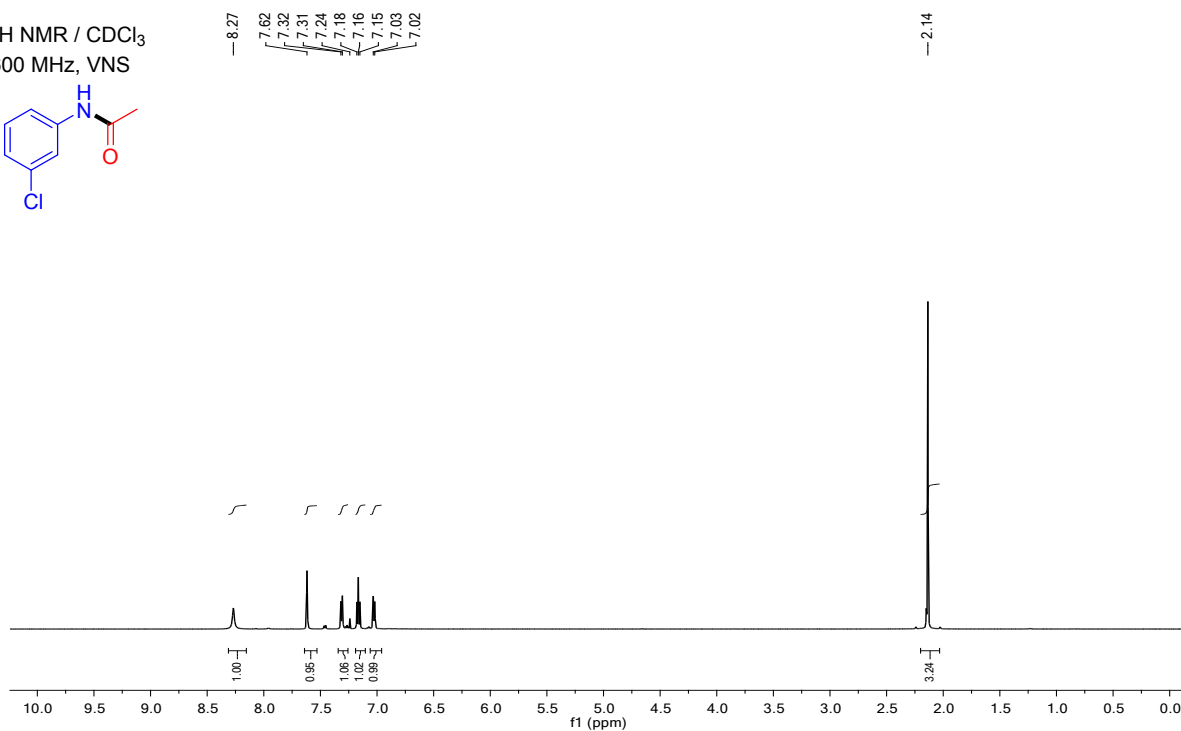

$^{13}\text{C}$  NMR /  $\text{CDCl}_3$   
600 MHz, VNS

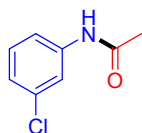

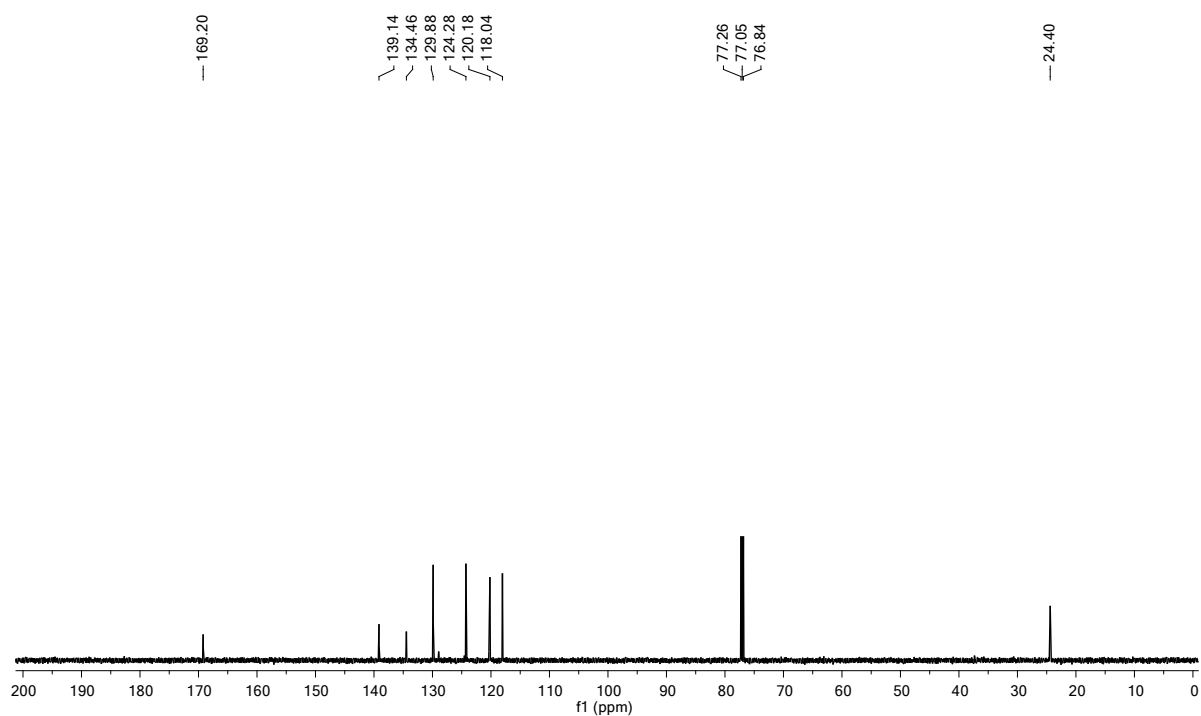

***N*-(4-Methoxyphenyl)acetamide (3c):**  $^1\text{H}$  NMR (600 MHz,  $\text{CDCl}_3$ )  $\delta$  8.07 (s, 1H), 7.37 – 7.33 (m, 2H), 6.81 – 6.73 (m, 2H), 3.73 (s, 3H), 2.07 (s, 3H);  $^{13}\text{C}$  NMR (150 MHz,  $\text{CDCl}_3$ )  $\delta$  168.8, 156.3, 131.1, 122.1, 113.9, 55.4, 24.0.

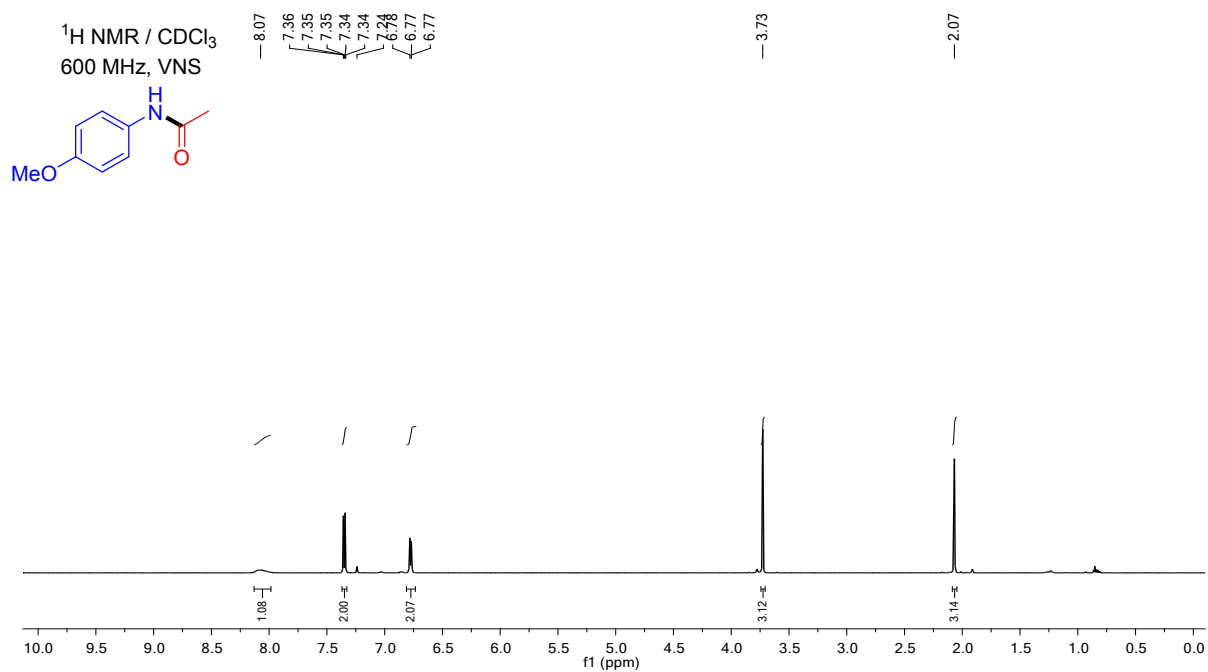

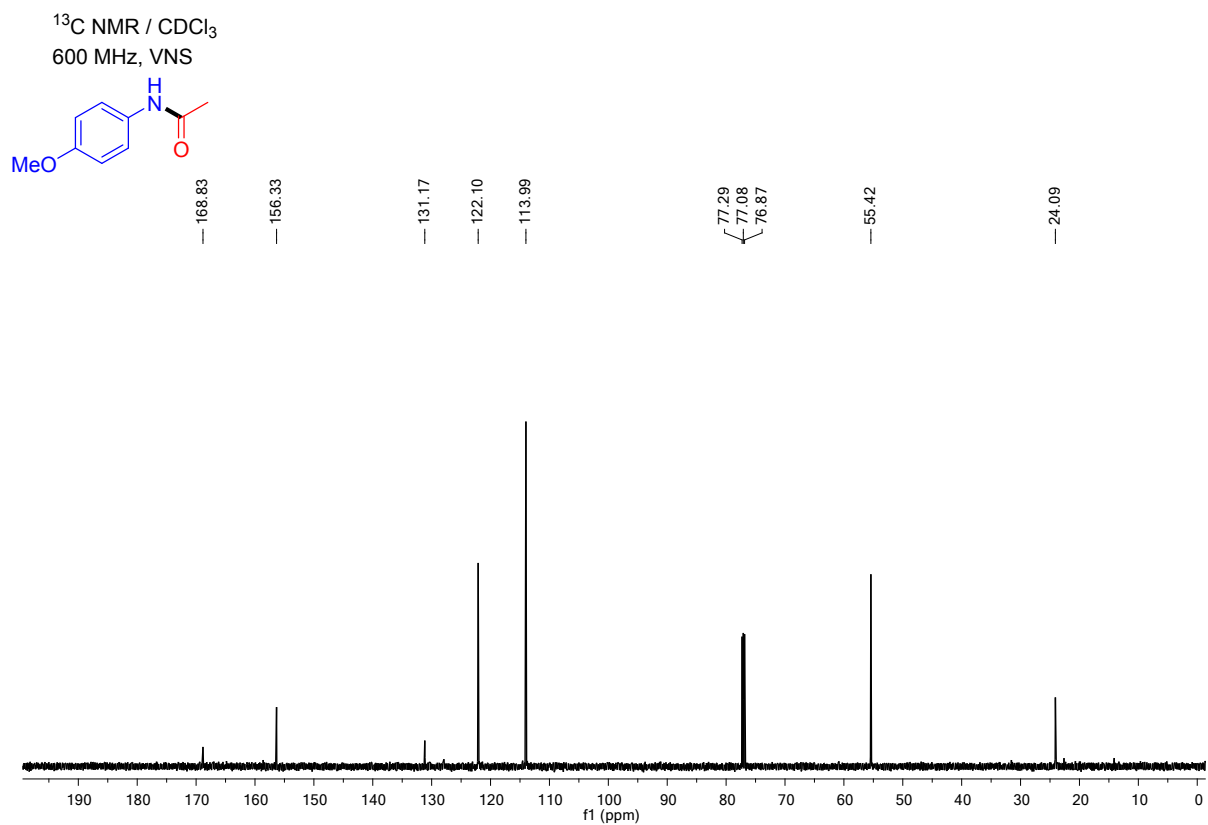

**2,2,2-trifluoro-*N*-phenylacetamide (3d):** <sup>1</sup>H NMR (600 MHz, CDCl<sub>3</sub>) δ 8.13 (s, 1H), 7.59 – 7.55 (m, 2H), 7.39 (dd, *J* = 10.8, 5.1 Hz, 2H), 7.26 (dd, *J* = 11.7, 4.3 Hz, 1H); <sup>13</sup>C NMR (150 MHz, CDCl<sub>3</sub>) δ 159.6, 154.9 (q, *J* = 37.5), 135.0, 129.2, 126.3, 120.6, 115.7 (q, *J* = 286.5 Hz).

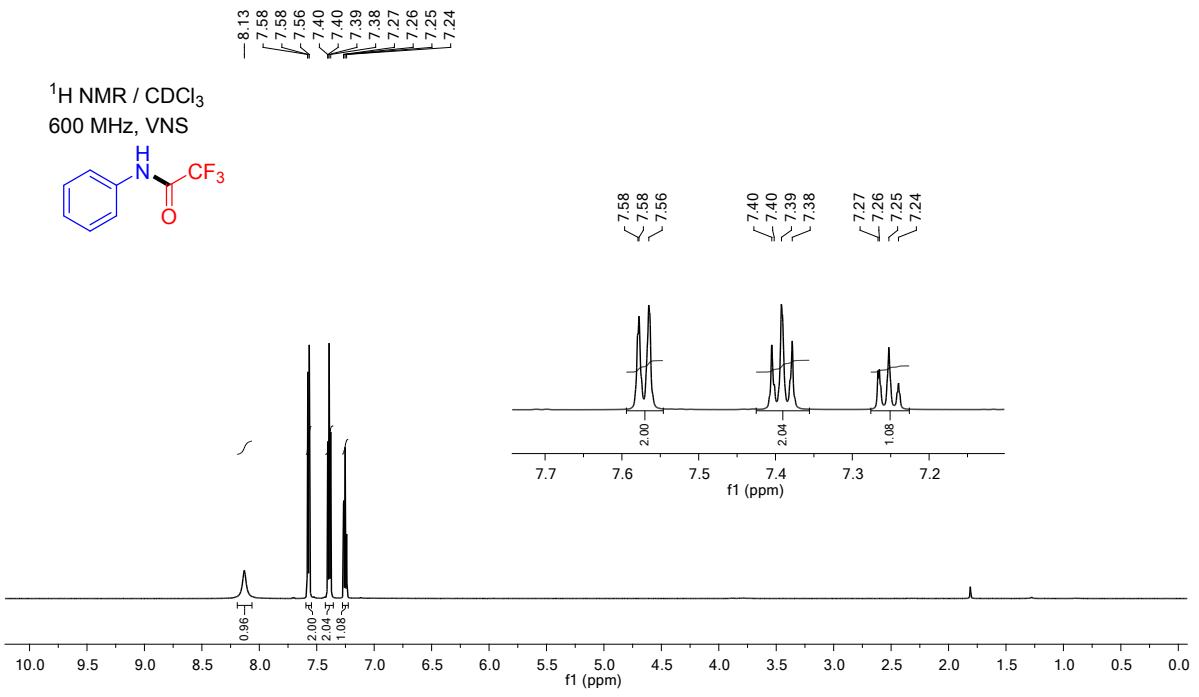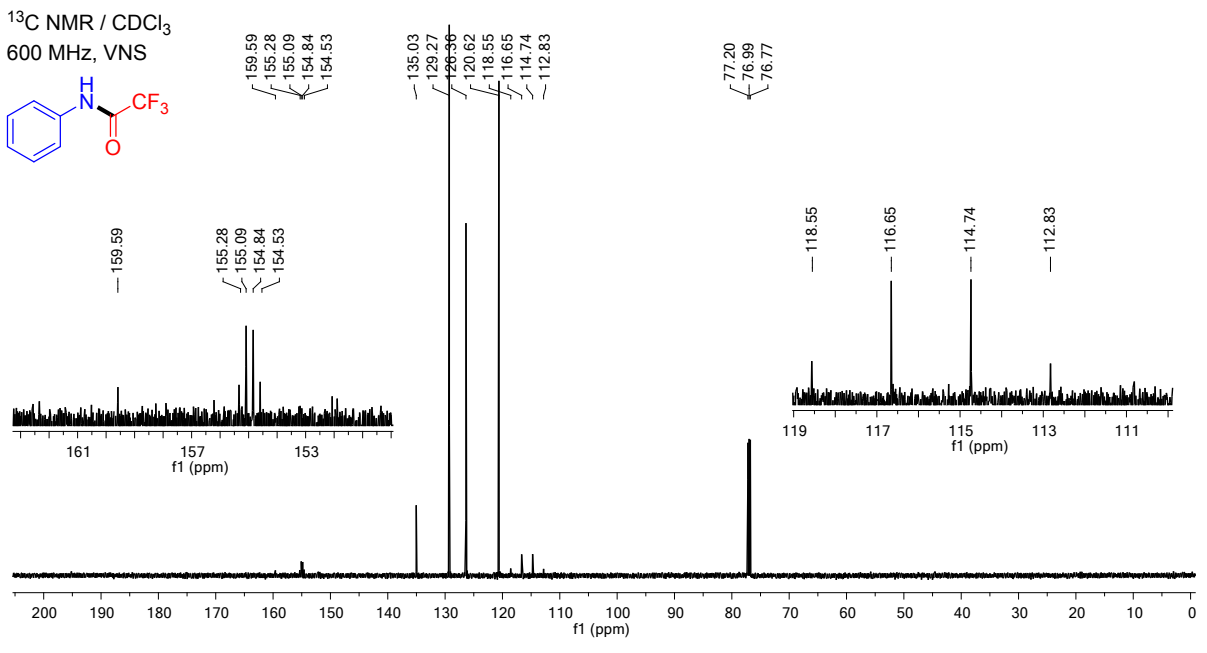

Supplement: RA-008-C8RA04502J-s001.pdf [file RA-008-C8RA04502J-s001.pdf]
